# Supplementary material for: Transcriptome-Wide Identification and Characterization of MicroRNAs from Castor Bean (Ricinus communis L.)
Source: PLoS One. 2013 Jul 24;8(7):e69995. doi: 10.1371/journal.pone.0069995 (PMC3722108; doi:10.1371/journal.pone.0069995)
Supplement: Table S5 — The 86 primers designed for RT-PCR amplification of 95 miRNAs newly identified in this study. (XLS) [file pone.0069995.s007.xls]

## Sheet: Sheet1
Table S5. The 86 primers designed for RT-PCR amplification of 95 miRNAs newly identified in this study.
miRNA ID	miRNA Sequence	primer sequence (5'-3')
rco-miR167d	TAAAGCTGCCAGCATGATCTA	gTAAAGCTGCCAGCATGATCT
rco-miR169d	CAGCCAAGGATGACTTGCCGA	CAGCCAAGGATGACTTGCCG
rco-miR169e	CAGCCAAGGATGACTTGCCGA
rco-miR169f	CAGCCAAGGATGACTTGCCGA
rco-miR169g	TAGCCAAGGATGACTTGCCTG	gggCAAGGATGACTTGCCTG
rco-miR169h	TAGCCAAGGATGACTTGCCTG
rco-miR169i	TAGCCAAGGATGACTTGCCCA
rco-miR169j	TAGCCAAGGATGACTTGCCCG	TAGCCAAGGATGACTTGCCCG
rco-miR169k	TAGCCAAGGATGACTTGCCCG
rco-miR169l	TAGCCAAGGATGACTTGCCCA	TAGCCAAGGATGACTTGCCCA
rco-miR171h	TTGAGCCGCGTCAATATCTCC	TTGAGCCGCGTCAATATCTC
rco-miR171i	CGAGCCGAATCAATATCACTC	CGAGCCGAATCAATATCACT
rco-miR172b	AGAATCTTGATGATGCTGCAT	ggAGAATCTTGATGATGCTGC
rco-miR172c	AGAATCTTGATGATGCTGCAT
rco-miR172d	AGAATCTTGATGATGCTGCAT
rco-miR393b	TCCAAAGGGATCGCATTGATCC	ggCAAAGGGATCGCATTGATC
rco-miR394a	TTGGCATTCTGTCCACCTCC	TTGGCATTCTGTCCACCTCC
rco-miR394b	TTGGCATTCTGTCCACCTCC
rco-miR396b	TTCCACAGCTTTCTTGAACTG	ccTCCACAGCTTTCTTGAACT
rco-miR396c	TTCCACAGCTTTCTTGAACTG
rco-miR482	GGAATGGGCGGTTTGGGAAAG	GGAATGGGCGGTTTGGGAA
rco-miR827	TTAGATGACCATCAACAAACA	cgaTTAGATGACCATCAACAAAC
rco-miR2111	TAATCTGCATCCTGAGGTTTA	ggTAATCTGCATCCTGAGGTT
rco-miR4414	TATGAATGATGCGGGAGATAA	ggTATGAATGATGCGGGAGAT
rcomiR001	TTGGAGGATAGTTTCAGGCCGG	ggcgTTGGAGGATAGTTTCAG
rcomiR002	GTGGACGTGCCGGAGTGGTTA	ttGACGTGCCGGAGTGGTT
rcomiR003	TCTGATAGCAAAAGATAGAAC	ggggTCTGATAGCAAAAGATAG
rcomiR004	CAACGGATAGGTATACAGTTTT	gggCAACGGATAGGTATACAG
rcomiR005	TCTGAAATTGCAGAGCCTAAA	ggTCTGAAATTGCAGAGCCTA
rcomiR006	TCTTTGTAGTTTTGATCCGGAG	gggcgTCTTTGTAGTTTTGAT
rcomiR007	AGAGAAGGATGGTAGAGATGGTT	gAGAGAAGGATGGTAGAGATGGT
rcomiR008	TATCTTTGTAGTTTTGATCCGG	cctTATCTTTGTAGTTTTGATCCG
rcomiR009	TGAAGATGAAGAGCTATGTTTGA	ggTGAAGATGAAGAGCTATGTTTG
rcomiR010	TGAGGAAGAGGATGACTTTGGA	gggTGAGGAAGAGGATGACT
rcomiR011	TCTCTAATTCGCTTGGTGCAG	TCTCTAATTCGCTTGGTGCA
rcomiR012	CAATTGGATCGTTATTTGCTA	ggggCAATTGGATCGTTATT
rcomiR013	AGGTGCAGGTGTGAGTGCAGG	aaGTGCAGGTGTGAGTGCAG
rcomiR014	TAATCTTGCTAACGGACTAAA	gggTAATCTTGCTAACGGACTA
rcomiR015	GCCGCTATGGTGAAATCGGT	aaaGCCGCTATGGTGAAATC
rcomiR016	AAGCCTGCGAGAGAGAGTTGG	AAGCCTGCGAGAGAGAGTTG
rcomiR017	AGGCCGATGACGATTAGAGGACG	caCCGATGACGATTAGAGGAC
rcomiR018	TTCAAAAGGAGAACAAGGATAA	gggTCAAAAGGAGAACAAGGATA
rcomiR019	ACATCCTTGAAGCTAACTCTA	gggACATCCTTGAAGCTAACTC
rcomiR020	AGGCAGTCATCTCTTGGCTAC	ggtAGGCAGTCATCTCTTGG
rcomiR021	CGAGTCATCTGACAGAAGTAG	ggCGAGTCATCTGACAGAAGTA
rcomiR022	AGTGGGCGGAAAGGGGGGGTA	ataGGCGGAAAGGGGGGGT
rcomiR023	TTTTATCACCGTCAGATTCTA	gcTTTTATCACCGTCAGATTCT
rcomiR024	TTTTGCCTACACCACCCATTCC	TTTTGCCTACACCACCCATT
rcomiR025	AATAGTGATTGTGATATTGGCC	ggAATAGTGATTGTGATATTGGC
rcomiR026	ATTTTAGGAAGGGAATGAACA	ggATTTTAGGAAGGGAATGAAC
rcomiR027	TTATTTTGATTTTGGACGTTTC	gggTTATTTTGATTTTGGACGTT
rcomiR028	TCTTATAGCAATCAGGGGACTTG	ggTCTTATAGCAATCAGGGGAC
rcomiR029	TATGGGGGGATCGGGCAATAT	TAAGGGGGGATCGGGCAATA
rcomiR030	GTCTGGGTGGTGTAGTCGGTT	GTCTGGGTGGTGTAGTCGGT
rcomiR031	TGTCGCTGGAGAGATGGCGCCA	ataGTCGCTGGAGAGATGGC
rcomiR032	GAGGTCCTGTAGGGAGAGTGG	ggAGGTCCTGTAGGGAGAGTG
rcomiR033	TCCGGAGAGATTTGTGGACGA	tttGGAGAGATTTGTGGACGA
rcomiR034	TCAGGTGGAGAATCAAACAGA	ggTCAGGTGGAGAATCAAACAG
rcomiR035	TCCGGAGAGATTTGTGGACGAT	CGGAGAGATTTGTGGACGA
rcomiR036	CATGGACCAGAAGGCATATAC	gCATGGACCAGAAGGCATAT
rcomiR037	CTGAGACTTGAGGGATAGGTGTT	gCTGAGACTTGAGGGATAGGTGT
rcomiR038	TGACGTGGCATGAACTTCGGCA	agaTGACGTGGCATGAACTTC
rcomiR039	TAGAGCCAAGAATGACTTGCCGG	TAGAGCCAAGAATGACTTGCC
rcomiR040	ACTCTCTCTGAAGGCTTCAAA	ggACTCTCTCTGAAGGCTTCAA
rcomiR041	TCCGGAGAGATTTGTGGACGAT	gcGAGAGATTTGTGGACGA
rcomiR042	TCTGTCGCAGGAAAGATGGTAC	aaTGTCGCAGGAAAGATGGTA
rcomiR043	TTTGCATGACCTGGGAGACGT	tcTGCATGACCTGGGAGAC
rcomiR044	TGGAAATTTCTGGGTTGGAGG	TGGAAATTTCTGGGTTGGAG
rcomiR045	ATCAAATAAGGAAGAATCGAG	gcATCAAATAAGGAAGAATCGA
rcomiR046	TCGAAAGAGATATCAAGGACTG	ggTCGAAAGAGATATCAAGGACT
rcomiR047	GGAGGCCTTTGAGCAGAGTGGA	GGAGGCCTTTGAGCAGAGTG
rcomiR048	TTGGCATCAGAGGAGTCAAGC	TTGGCATCAGAGGAGTCAAG
rcomiR049	TAGGCAAAGCATCAGGATTCAT	TAGGCAAAGCATCAGGATTCA
rcomiR050	TGTTTTTTGATCAGGACCATAA	ggTGTTTTTTGATCAGGACCATA
rcomiR051	CTGTCGCAGGAGCGGTGGCACC	taaCTGTCGCAGGAGCGGT
rcomiR052	GGTATTGGACGGGTTGGCAAGA	aGGTATTGGACGGGTTGGCA
rcomiR053	TCGAACCCAACTAGAAGATCTC	cgTCGAACCCAACTAGAAGATC
rcomiR054	TATGGGAGGCATGGTCAGAAA	agTATGGGAGGCATGGTCAGA
rcomiR055	TGGACAAGTAGAGGTTACTAAT	ggggTGGACAAGTAGAGGTTAC
rcomiR056	TCTGGATGAAGGCTGGAGTGAT	TCTGGATGAAGGCTGGAGTG
rcomiR057	GCCGCTATGGTGAAATCGGT	taaGCCGCTATGGTGAAATC
rcomiR058	TGAGGTTGGGTTGGACGACATA	ttaTGAGGTTGGGTTGGACGA
rcomiR059	CAGCAAGGATTAAGGGACATTT	CAGCAAGGATTAAGGGACATT
rcomiR060	TCTGAAGCTGTGAATGGGAAT	gTCTGAAGCTGTGAATGGGAA
rcomiR061	GAACGGCATTTGTAGCCCAGGAG	ttaGAACGGCATTTGTAGCCCAG
rcomiR062	TCTGAATCAGGCTCTATATTAG	TCTGAATCAGGCTCTATATTAG
rcomiR063	TTGAACAGTAGGAAGAGGGTTT	ggaTTGAACAGTAGGAAGAGGGT
rcomiR064	TCTTTATATAGAGGTCTCGGAG	gggTCTTTATATAGAGGTCTCGGA
rcomiR065	TTTTGTGCCAAGAACGTTGTTT	ggggTTGTGCCAAGAACGTTGT
rcomiR066	TGGATAAGTTTCAGGAGATCTC	gggTGGATAAGTTTCAGGAGAT
rcomiR067	TGGGCTTTGAAGAAGAAGGTA	TGGGCTTTGAAGAAGAAGGT
rcomiR068	TCATCAGATGAAGAGCATGACC	ggacCAGATGAAGAGCATGAC
rcomiR069	TGGGCTAGAGCATTAGAAGTTT	ggTGGGCTAGAGCATTAGAAGT
rcomiR070	TCTGGGAGTAGATTGAAGTGAA	TCTGGGAGTAGATTGAAGTGAA
rcomiR071	ATTGAGTTGGTAGAAGGTGCAA	ggATTGAGTTGGTAGAAGGTGC
rcomiR072	TTAGGAAAGCAGCTTGACACGTG	TAGGAAAGCAGCTTGACACGT
